# Supplementary material for: Impaired inhibitory reno-renal reflex responses in chronic kidney disease
Source: Front Physiol. 2025 Apr 9;16:1544592. doi: 10.3389/fphys.2025.1544592 (PMC12014541; doi:10.3389/fphys.2025.1544592)
Supplement: Supplementary file 2 [file Table1.xlsx]

## Sheet: Figure 3A SBP
Bonferroni's multiple comparisons test	Predicted (LS) mean diff.	95.00% CI of diff.	Below threshold?	Summary	Adjusted P Value
Lewis Depressor
2Hz vs. 5Hz	14	4.0 to 24	Yes	**	0.0012
2Hz vs. 10Hz	20	10 to 30	Yes	****	<0.0001
2Hz vs. 20Hz	21	11 to 31	Yes	****	<0.0001
2Hz vs. 40Hz	27	17 to 37	Yes	****	<0.0001
5Hz vs. 10Hz	6.3	-3.7 to 16	No	ns	0.7442
5Hz vs. 20Hz	7.2	-2.8 to 17	No	ns	0.4045
5Hz vs. 40Hz	13	2.5 to 23	Yes	**	0.0055
10Hz vs. 20Hz	0.96	-9.1 to 11	No	ns	>0.9999
10Hz vs. 40Hz	6.2	-3.8 to 16	No	ns	0.7622
20Hz vs. 40Hz	5.3	-4.7 to 15	No	ns	>0.9999
LPK Depressor
2Hz vs. 5Hz	3.6	-5.8 to 13	No	ns	>0.9999
2Hz vs. 10Hz	8.5	-0.64 to 18	No	ns	0.0878
2Hz vs. 20Hz	12	3.3 to 22	Yes	**	0.0018
2Hz vs. 40Hz	17	7.7 to 26	Yes	****	<0.0001
5Hz vs. 10Hz	4.9	-4.5 to 14	No	ns	>0.9999
5Hz vs. 20Hz	8.9	-0.51 to 18	No	ns	0.0775
5Hz vs. 40Hz	13	3.9 to 23	Yes	**	0.0011
10Hz vs. 20Hz	4	-5.2 to 13	No	ns	>0.9999
10Hz vs. 40Hz	8.3	-0.80 to 17	No	ns	0.1012
20Hz vs. 40Hz	4.4	-4.8 to 14	No	ns	>0.9999
	Mean Diff.	95.00% CI of diff.	Below threshold?	Summary	Adjusted P Value
LPK Pressor
2Hz vs. 5Hz	-2.3	-8.5 to 3.9	No	ns	>0.9999
2Hz vs. 10Hz	-4.8	-13 to 3.6	No	ns	0.719
2Hz vs. 20Hz	-5.3	-16 to 5.3	No	ns	>0.9999
2Hz vs. 40Hz	-3.3	-12 to 5.5	No	ns	>0.9999
5Hz vs. 10Hz	-2.5	-8.8 to 3.8	No	ns	>0.9999
5Hz vs. 20Hz	-3	-10 to 4.4	No	ns	>0.9999
5Hz vs. 40Hz	-0.96	-8.0 to 6.1	No	ns	>0.9999
10Hz vs. 20Hz	-0.46	-6.7 to 5.8	No	ns	>0.9999
10Hz vs. 40Hz	1.5	-2.1 to 5.2	No	ns	>0.9999
20Hz vs. 40Hz	2	-7.0 to 11	No	ns	>0.9999

## Sheet: Figure 3B HR
Bonferroni's multiple comparisons test	Mean Diff.	95.00% CI of diff.	Below threshold?	Summary	Adjusted P Value
Lewis Bradycardia
2Hz vs. 5Hz	0.039	-4.2 to 4.3	No	ns	>0.9999
2Hz vs. 10Hz	2.4	-5.8 to 11	No	ns	>0.9999
2Hz vs. 20Hz	2.7	-3.7 to 9.2	No	ns	>0.9999
2Hz vs. 40Hz	3.5	-2.8 to 9.9	No	ns	0.5982
5Hz vs. 10Hz	2.4	-3.6 to 8.4	No	ns	>0.9999
5Hz vs. 20Hz	2.7	-1.6 to 6.9	No	ns	0.3844
5Hz vs. 40Hz	3.5	-0.66 to 7.7	No	ns	0.1161
10Hz vs. 20Hz	0.27	-4.5 to 5.0	No	ns	>0.9999
10Hz vs. 40Hz	1.1	-2.9 to 5.1	No	ns	>0.9999
20Hz vs. 40Hz	0.83	-2.1 to 3.8	No	ns	>0.9999
LPK Tachycardia
2Hz vs. 5Hz	-5.5	-10 to -0.81	Yes	*	0.0183
2Hz vs. 10Hz	-8.8	-13 to -4.3	Yes	***	0.0003
2Hz vs. 20Hz	-7.9	-13 to -2.5	Yes	**	0.0034
2Hz vs. 40Hz	-6.1	-11 to -1.4	Yes	**	0.0078
5Hz vs. 10Hz	-3.3	-6.2 to -0.36	Yes	*	0.0244
5Hz vs. 20Hz	-2.4	-8.2 to 3.5	No	ns	>0.9999
5Hz vs. 40Hz	-0.6	-5.3 to 4.1	No	ns	>0.9999
10Hz vs. 20Hz	0.92	-4.1 to 5.9	No	ns	>0.9999
10Hz vs. 40Hz	2.7	-0.035 to 5.4	No	ns	0.0542
20Hz vs. 40Hz	1.8	-2.0 to 5.5	No	ns	>0.9999

## Sheet: Figure 3C SNA
Bonferroni's multiple comparisons test	Predicted (LS) mean diff.	95.00% CI of diff.	Below threshold?	Summary	Adjusted P Value
Lewis SNA
2Hz vs. 5Hz	-9.1	-23 to 5.2	No	ns	0.701
2Hz vs. 10Hz	-22	-36 to -7.4	Yes	***	0.0004
2Hz vs. 20Hz	-27	-42 to -13	Yes	****	<0.0001
2Hz vs. 40Hz	-24	-38 to -9.7	Yes	****	<0.0001
5Hz vs. 10Hz	-13	-27 to 1.7	No	ns	0.1283
5Hz vs. 20Hz	-18	-33 to -4.0	Yes	**	0.0042
5Hz vs. 40Hz	-15	-29 to -0.59	Yes	*	0.0354
10Hz vs. 20Hz	-5.7	-20 to 8.7	No	ns	>0.9999
10Hz vs. 40Hz	-2.3	-17 to 12	No	ns	>0.9999
20Hz vs. 40Hz	3.4	-11 to 18	No	ns	>0.9999
LPK SNA
2Hz vs. 5Hz	-21	-33 to -9.2	Yes	****	<0.0001
2Hz vs. 10Hz	-41	-52 to -29	Yes	****	<0.0001
2Hz vs. 20Hz	-36	-48 to -25	Yes	****	<0.0001
2Hz vs. 40Hz	-36	-48 to -25	Yes	****	<0.0001
5Hz vs. 10Hz	-19	-31 to -7.4	Yes	***	0.0001
5Hz vs. 20Hz	-15	-27 to -2.9	Yes	**	0.0059
5Hz vs. 40Hz	-15	-27 to -3.1	Yes	**	0.0051
10Hz vs. 20Hz	4.5	-7.2 to 16	No	ns	>0.9999
10Hz vs. 40Hz	4.3	-7.4 to 16	No	ns	>0.9999
20Hz vs. 40Hz	-0.17	-12 to 12	No	ns	>0.9999

## Sheet: Figure 5A SBP
Bonferroni's multiple comparisons test	Predicted (LS) mean diff.	95.00% CI of diff.	Below threshold?	Summary	Adjusted P Value
Lewis Depressor
2Hz vs. 5Hz	7.3	-0.96 to 16	No	ns	0.1235
2Hz vs. 10Hz	14	5.4 to 22	Yes	***	0.0001
2Hz vs. 20Hz	16	8.1 to 25	Yes	****	<0.0001
2Hz vs. 40Hz	17	8.4 to 25	Yes	****	<0.0001
5Hz vs. 10Hz	6.4	-1.9 to 15	No	ns	0.2797
5Hz vs. 20Hz	9	0.74 to 17	Yes	*	0.0239
5Hz vs. 40Hz	9.3	1.0 to 18	Yes	*	0.0178
10Hz vs. 20Hz	2.6	-5.7 to 11	No	ns	>0.9999
10Hz vs. 40Hz	2.9	-5.4 to 11	No	ns	>0.9999
20Hz vs. 40Hz	0.29	-8.0 to 8.6	No	ns	>0.9999
LPK Depressor
2Hz vs. 5Hz	15	4.6 to 26	Yes	**	0.0011
2Hz vs. 10Hz	21	10 to 32	Yes	****	<0.0001
2Hz vs. 20Hz	19	8.3 to 30	Yes	****	<0.0001
2Hz vs. 40Hz	23	13 to 34	Yes	****	<0.0001
5Hz vs. 10Hz	5.8	-4.9 to 16	No	ns	>0.9999
5Hz vs. 20Hz	3.7	-7.0 to 14	No	ns	>0.9999
5Hz vs. 40Hz	8.1	-2.6 to 19	No	ns	0.3133
10Hz vs. 20Hz	-2.1	-13 to 8.6	No	ns	>0.9999
10Hz vs. 40Hz	2.3	-8.4 to 13	No	ns	>0.9999
20Hz vs. 40Hz	4.4	-6.3 to 15	No	ns	>0.9999
Bonferroni's multiple comparisons test	Predicted (LS) mean diff.	95.00% CI of diff.	Below threshold?	Summary	Adjusted P Value
Lewis Pressor
2Hz vs. 5Hz	-2.7	-9.4 to 4.0	No	ns	>0.9999
2Hz vs. 10Hz	-6.2	-13 to 0.49	No	ns	0.0898
2Hz vs. 20Hz	-5.3	-12 to 1.4	No	ns	0.2416
2Hz vs. 40Hz	-6.3	-13 to 0.40	No	ns	0.081
5Hz vs. 10Hz	-3.5	-10 to 3.2	No	ns	>0.9999
5Hz vs. 20Hz	-2.6	-9.3 to 4.1	No	ns	>0.9999
5Hz vs. 40Hz	-3.6	-10 to 3.1	No	ns	>0.9999
10Hz vs. 20Hz	0.89	-5.8 to 7.6	No	ns	>0.9999
10Hz vs. 40Hz	-0.088	-6.8 to 6.6	No	ns	>0.9999
20Hz vs. 40Hz	-0.98	-7.7 to 5.7	No	ns	>0.9999
LPK Pressor
2Hz vs. 5Hz	-11	-20 to -2.6	Yes	**	0.0036
2Hz vs. 10Hz	-18	-27 to -9.4	Yes	****	<0.0001
2Hz vs. 20Hz	-22	-30 to -13	Yes	****	<0.0001
2Hz vs. 40Hz	-16	-24 to -6.9	Yes	****	<0.0001
5Hz vs. 10Hz	-6.8	-15 to 1.8	No	ns	0.2387
5Hz vs. 20Hz	-10	-19 to -1.8	Yes	**	0.0079
5Hz vs. 40Hz	-4.3	-13 to 4.3	No	ns	>0.9999
10Hz vs. 20Hz	-3.6	-12 to 5.0	No	ns	>0.9999
10Hz vs. 40Hz	2.5	-6.1 to 11	No	ns	>0.9999
20Hz vs. 40Hz	6.1	-2.5 to 15	No	ns	0.4239
Bonferroni's multiple comparisons test	Predicted (LS) mean diff.	95.00% CI of diff.	Below threshold?	Summary	Adjusted P Value
Lewis Depressor
2Hz vs. 5Hz	7.3	-0.96 to 16	No	ns	0.1235
2Hz vs. 10Hz	14	5.4 to 22	Yes	***	0.0001
2Hz vs. 20Hz	16	8.1 to 25	Yes	****	<0.0001
2Hz vs. 40Hz	17	8.4 to 25	Yes	****	<0.0001
5Hz vs. 10Hz	6.4	-1.9 to 15	No	ns	0.2797
5Hz vs. 20Hz	9	0.74 to 17	Yes	*	0.0239
5Hz vs. 40Hz	9.3	1.0 to 18	Yes	*	0.0178
10Hz vs. 20Hz	2.6	-5.7 to 11	No	ns	>0.9999
10Hz vs. 40Hz	2.9	-5.4 to 11	No	ns	>0.9999
20Hz vs. 40Hz	0.29	-8.0 to 8.6	No	ns	>0.9999
LPK Depressor
2Hz vs. 5Hz	15	4.6 to 26	Yes	**	0.0011
2Hz vs. 10Hz	21	10 to 32	Yes	****	<0.0001
2Hz vs. 20Hz	19	8.3 to 30	Yes	****	<0.0001
2Hz vs. 40Hz	23	13 to 34	Yes	****	<0.0001
5Hz vs. 10Hz	5.8	-4.9 to 16	No	ns	>0.9999
5Hz vs. 20Hz	3.7	-7.0 to 14	No	ns	>0.9999
5Hz vs. 40Hz	8.1	-2.6 to 19	No	ns	0.3133
10Hz vs. 20Hz	-2.1	-13 to 8.6	No	ns	>0.9999
10Hz vs. 40Hz	2.3	-8.4 to 13	No	ns	>0.9999
20Hz vs. 40Hz	4.4	-6.3 to 15	No	ns	>0.9999

## Sheet: Figure 5B HR
Bonferroni's multiple comparisons test	Predicted (LS) mean diff.	95.00% CI of diff.	Below threshold?	Summary	Adjusted P Value
Lewis Tachycardia
2Hz vs. 5Hz	-1.8	-9.4 to 5.8	No	ns	>0.9999
2Hz vs. 10Hz	-4.5	-12 to 3.1	No	ns	0.8846
2Hz vs. 20Hz	-5.3	-13 to 2.3	No	ns	0.4582
2Hz vs. 40Hz	-4.4	-12 to 3.2	No	ns	0.9824
5Hz vs. 10Hz	-2.7	-10 to 4.9	No	ns	>0.9999
5Hz vs. 20Hz	-3.5	-11 to 4.1	No	ns	>0.9999
5Hz vs. 40Hz	-2.6	-10 to 5.0	No	ns	>0.9999
10Hz vs. 20Hz	-0.8	-8.4 to 6.8	No	ns	>0.9999
10Hz vs. 40Hz	0.14	-7.5 to 7.7	No	ns	>0.9999
20Hz vs. 40Hz	0.94	-6.7 to 8.5	No	ns	>0.9999
LPK Tachycardia
2Hz vs. 5Hz	-8.3	-18 to 1.5	No	ns	0.1615
2Hz vs. 10Hz	-11	-21 to -1.7	Yes	*	0.0116
2Hz vs. 20Hz	-12	-22 to -2.4	Yes	**	0.0055
2Hz vs. 40Hz	-12	-21 to -1.9	Yes	**	0.0094
5Hz vs. 10Hz	-3.1	-13 to 6.7	No	ns	>0.9999
5Hz vs. 20Hz	-3.9	-14 to 5.9	No	ns	>0.9999
5Hz vs. 40Hz	-3.3	-13 to 6.4	No	ns	>0.9999
10Hz vs. 20Hz	-0.79	-11 to 9.0	No	ns	>0.9999
10Hz vs. 40Hz	-0.23	-10 to 9.6	No	ns	>0.9999
20Hz vs. 40Hz	0.56	-9.2 to 10	No	ns	>0.9999

## Sheet: Supp Fig 6A SBP
Bonferroni's multiple comparisons test	Predicted (LS) mean diff.	95.00% CI of diff.	Below threshold?	Summary	Adjusted P Value
Lewis Depressor
2Hz vs. 5Hz	12	0.28 to 24	Yes	*	0.0416
2Hz vs. 10Hz	16	3.7 to 28	Yes	**	0.0037
2Hz vs. 20Hz	12	-0.38 to 24	No	ns	0.0644
2Hz vs. 40Hz	15	3.1 to 27	Yes	**	0.0057
5Hz vs. 10Hz	3.4	-8.6 to 15	No	ns	>0.9999
5Hz vs. 20Hz	-0.66	-13 to 11	No	ns	>0.9999
5Hz vs. 40Hz	2.8	-9.2 to 15	No	ns	>0.9999
10Hz vs. 20Hz	-4	-16 to 7.9	No	ns	>0.9999
10Hz vs. 40Hz	-0.6	-13 to 11	No	ns	>0.9999
20Hz vs. 40Hz	3.4	-8.5 to 15	No	ns	>0.9999
LPK Depressor
2Hz vs. 5Hz	12	-1.3 to 25	No	ns	0.1088
2Hz vs. 10Hz	21	8.1 to 34	Yes	***	0.0002
2Hz vs. 20Hz	22	9.2 to 35	Yes	****	<0.0001
2Hz vs. 40Hz	23	9.9 to 36	Yes	****	<0.0001
5Hz vs. 10Hz	9.4	-3.5 to 22	No	ns	0.3643
5Hz vs. 20Hz	11	-2.4 to 23	No	ns	0.2021
5Hz vs. 40Hz	11	-1.7 to 24	No	ns	0.1358
10Hz vs. 20Hz	1.1	-12 to 14	No	ns	>0.9999
10Hz vs. 40Hz	1.8	-11 to 15	No	ns	>0.9999
20Hz vs. 40Hz	0.71	-12 to 14	No	ns	>0.9999
Bonferroni's multiple comparisons test	Mean Diff.	95.00% CI of diff.	Below threshold?	Summary	Adjusted P Value
LPK Pressor
2Hz vs. 5Hz	-2.8	-11 to 5.2	No	ns	>0.9999
2Hz vs. 10Hz	-13	-27 to -0.076	Yes	*	0.0488
2Hz vs. 20Hz	-7.9	-30 to 15	No	ns	>0.9999
2Hz vs. 40Hz	-15	-26 to -4.3	Yes	*	0.0116
5Hz vs. 10Hz	-11	-27 to 6.0	No	ns	0.2817
5Hz vs. 20Hz	-5.1	-31 to 21	No	ns	>0.9999
5Hz vs. 40Hz	-12	-24 to -0.68	Yes	*	0.0393
10Hz vs. 20Hz	5.6	-4.5 to 16	No	ns	0.4511
10Hz vs. 40Hz	-1.7	-15 to 12	No	ns	>0.9999
20Hz vs. 40Hz	-7.3	-29 to 14	No	ns	>0.9999

## Sheet: Supp Fig 6B HR
Bonferroni's multiple comparisons test	Mean Diff.	95.00% CI of diff.	Below threshold?	Summary	Adjusted P Value
Lewis Bradycardia
2Hz vs. 5Hz	1.6	-1.2 to 4.4	No	ns	0.4568
2Hz vs. 10Hz	4.7	-3.9 to 13	No	ns	0.5535
2Hz vs. 20Hz	2.4	-0.26 to 5.0	No	ns	0.0805
2Hz vs. 40Hz	3.7	-1.6 to 8.9	No	ns	0.2322
5Hz vs. 10Hz	3.1	-6.6 to 13	No	ns	>0.9999
5Hz vs. 20Hz	0.76	-2.7 to 4.2	No	ns	>0.9999
5Hz vs. 40Hz	2	-2.8 to 6.8	No	ns	>0.9999
10Hz vs. 20Hz	-2.3	-9.5 to 4.9	No	ns	>0.9999
10Hz vs. 40Hz	-1.1	-7.5 to 5.4	No	ns	>0.9999
20Hz vs. 40Hz	1.3	-3.1 to 5.6	No	ns	>0.9999
LPK Tachycardia
2Hz vs. 5Hz	-5.7	-18 to 6.9	No	ns	0.8351
2Hz vs. 10Hz	-11	-20 to -1.4	Yes	*	0.0265
2Hz vs. 20Hz	-9.9	-22 to 2.5	No	ns	0.1244
2Hz vs. 40Hz	-11	-25 to 2.1	No	ns	0.1006
5Hz vs. 10Hz	-4.9	-15 to 5.0	No	ns	0.6446
5Hz vs. 20Hz	-4.2	-15 to 6.4	No	ns	>0.9999
5Hz vs. 40Hz	-5.7	-14 to 2.6	No	ns	0.2224
10Hz vs. 20Hz	0.67	-14 to 15	No	ns	>0.9999
10Hz vs. 40Hz	-0.77	-13 to 12	No	ns	>0.9999
20Hz vs. 40Hz	-1.4	-16 to 13	No	ns	>0.9999

## Sheet: Supp Figure 6C SNA
Bonferroni's multiple comparisons test	Predicted (LS) mean diff.	95.00% CI of diff.	Below threshold?	Summary	Adjusted P Value
Lewis SNA
2Hz vs. 5Hz	-5.7	-16 to 5.0	No	ns	>0.9999
2Hz vs. 10Hz	-7.9	-19 to 2.8	No	ns	0.3412
2Hz vs. 20Hz	-12	-23 to -1.8	Yes	*	0.0128
2Hz vs. 40Hz	-14	-24 to -3.0	Yes	**	0.0048
5Hz vs. 10Hz	-2.2	-13 to 8.5	No	ns	>0.9999
5Hz vs. 20Hz	-6.8	-17 to 3.9	No	ns	0.6862
5Hz vs. 40Hz	-8	-19 to 2.7	No	ns	0.3313
10Hz vs. 20Hz	-4.5	-15 to 6.2	No	ns	>0.9999
10Hz vs. 40Hz	-5.7	-16 to 5.0	No	ns	>0.9999
20Hz vs. 40Hz	-1.2	-12 to 9.5	No	ns	>0.9999
LPK SNA
2Hz vs. 5Hz	-23	-34 to -11	Yes	****	<0.0001
2Hz vs. 10Hz	-29	-40 to -17	Yes	****	<0.0001
2Hz vs. 20Hz	-43	-54 to -31	Yes	****	<0.0001
2Hz vs. 40Hz	-49	-61 to -37	Yes	****	<0.0001
5Hz vs. 10Hz	-6.2	-18 to 5.3	No	ns	>0.9999
5Hz vs. 20Hz	-20	-32 to -8.4	Yes	****	<0.0001
5Hz vs. 40Hz	-26	-38 to -15	Yes	****	<0.0001
10Hz vs. 20Hz	-14	-25 to -2.2	Yes	*	0.0102
10Hz vs. 40Hz	-20	-32 to -8.5	Yes	****	<0.0001
20Hz vs. 40Hz	-6.3	-18 to 5.2	No	ns	>0.9999

## Sheet: Supp Fig 7A SBP
Bonferroni's multiple comparisons test	Predicted (LS) mean diff.	95.00% CI of diff.	Below threshold?	Summary	Adjusted P Value
Lewis Depressor
2Hz vs. 5Hz	9.5	-0.61 to 20	No	ns	0.0802
2Hz vs. 10Hz	16	5.4 to 26	Yes	***	0.0004
2Hz vs. 20Hz	14	3.4 to 24	Yes	**	0.0027
2Hz vs. 40Hz	17	6.8 to 27	Yes	***	0.0001
5Hz vs. 10Hz	6	-4.1 to 16	No	ns	0.8499
5Hz vs. 20Hz	4	-6.1 to 14	No	ns	>0.9999
5Hz vs. 40Hz	7.4	-2.7 to 18	No	ns	0.355
10Hz vs. 20Hz	-2	-12 to 8.1	No	ns	>0.9999
10Hz vs. 40Hz	1.4	-8.7 to 12	No	ns	>0.9999
20Hz vs. 40Hz	3.4	-6.7 to 14	No	ns	>0.9999
LPK Depressor
2Hz vs. 5Hz	9.9	-1.0 to 21	No	ns	0.103
2Hz vs. 10Hz	16	5.3 to 27	Yes	***	0.0007
2Hz vs. 20Hz	21	10 to 32	Yes	****	<0.0001
2Hz vs. 40Hz	25	14 to 36	Yes	****	<0.0001
5Hz vs. 10Hz	6.3	-4.6 to 17	No	ns	0.9543
5Hz vs. 20Hz	11	0.041 to 22	Yes	*	0.0485
5Hz vs. 40Hz	15	3.9 to 26	Yes	**	0.0023
10Hz vs. 20Hz	4.7	-6.3 to 16	No	ns	>0.9999
10Hz vs. 40Hz	8.6	-2.4 to 20	No	ns	0.2554
20Hz vs. 40Hz	3.9	-7.1 to 15	No	ns	>0.9999
Bonferroni's multiple comparisons test	Predicted (LS) mean diff.	95.00% CI of diff.	Below threshold?	Summary	Adjusted P Value
Lewis Pressor
2Hz vs. 5Hz	-7.6	-17 to 2.1	No	ns	0.2454
2Hz vs. 10Hz	-7.5	-17 to 2.2	No	ns	0.2736
2Hz vs. 20Hz	-6.9	-17 to 2.8	No	ns	0.4199
2Hz vs. 40Hz	-9.4	-19 to 0.34	No	ns	0.0657
5Hz vs. 10Hz	0.15	-9.6 to 9.9	No	ns	>0.9999
5Hz vs. 20Hz	0.77	-8.9 to 10	No	ns	>0.9999
5Hz vs. 40Hz	-1.7	-11 to 8.0	No	ns	>0.9999
10Hz vs. 20Hz	0.62	-9.1 to 10	No	ns	>0.9999
10Hz vs. 40Hz	-1.9	-12 to 7.8	No	ns	>0.9999
20Hz vs. 40Hz	-2.5	-12 to 7.2	No	ns	>0.9999
LPK Pressor
2Hz vs. 5Hz	-9.3	-20 to 1.2	No	ns	0.1176
2Hz vs. 10Hz	-17	-28 to -6.7	Yes	***	0.0002
2Hz vs. 20Hz	-21	-31 to -10	Yes	****	<0.0001
2Hz vs. 40Hz	-23	-34 to -13	Yes	****	<0.0001
5Hz vs. 10Hz	-7.9	-18 to 2.6	No	ns	0.3114
5Hz vs. 20Hz	-11	-22 to -0.86	Yes	*	0.0258
5Hz vs. 40Hz	-14	-25 to -3.5	Yes	**	0.0029
10Hz vs. 20Hz	-3.5	-14 to 7.0	No	ns	>0.9999
10Hz vs. 40Hz	-6.1	-17 to 4.4	No	ns	0.9146
20Hz vs. 40Hz	-2.7	-13 to 7.8	No	ns	>0.9999

## Sheet: Supp Fig 7B HR
Bonferroni's multiple comparisons test	Predicted (LS) mean diff.	95.00% CI of diff.	Below threshold?	Summary	Adjusted P Value
Lewis Tachycardia
2Hz vs. 5Hz	-1.9	-7.5 to 3.7	No	ns	>0.9999
2Hz vs. 10Hz	-1.5	-7.1 to 4.1	No	ns	>0.9999
2Hz vs. 20Hz	-4.1	-9.7 to 1.5	No	ns	0.3504
2Hz vs. 40Hz	-3.8	-9.4 to 1.7	No	ns	0.4819
5Hz vs. 10Hz	0.41	-5.2 to 6.0	No	ns	>0.9999
5Hz vs. 20Hz	-2.2	-7.8 to 3.4	No	ns	>0.9999
5Hz vs. 40Hz	-1.9	-7.5 to 3.6	No	ns	>0.9999
10Hz vs. 20Hz	-2.6	-8.2 to 3.0	No	ns	>0.9999
10Hz vs. 40Hz	-2.4	-7.9 to 3.2	No	ns	>0.9999
20Hz vs. 40Hz	0.27	-5.3 to 5.9	No	ns	>0.9999
LPK Tachycardia
2Hz vs. 5Hz	-11	-17 to -4.9	Yes	****	<0.0001
2Hz vs. 10Hz	-18	-24 to -12	Yes	****	<0.0001
2Hz vs. 20Hz	-20	-26 to -14	Yes	****	<0.0001
2Hz vs. 40Hz	-17	-23 to -11	Yes	****	<0.0001
5Hz vs. 10Hz	-7.5	-14 to -1.4	Yes	**	0.0069
5Hz vs. 20Hz	-9.4	-15 to -3.4	Yes	***	0.0003
5Hz vs. 40Hz	-6.3	-12 to -0.29	Yes	*	0.0339
10Hz vs. 20Hz	-2	-8.0 to 4.1	No	ns	>0.9999
10Hz vs. 40Hz	1.1	-4.9 to 7.2	No	ns	>0.9999
20Hz vs. 40Hz	3.1	-3.0 to 9.1	No	ns	>0.9999
